# Supplementary material
Source: PubMed Central journal article supplement (PMC6854443)
Supplement: NIHMS1540622-supplement-1.pdf [file NIHMS1540622-supplement-1.pdf]

## Appendix A: Supplemental Material

| <b>Table A-1. Comparison of Liver Effects and Associated Effect Levels from Repeated-Dose Animal Studies for Non-Cancer Oral Toxicity for <i>p,p'</i>-DDD and Analogues<sup>a</sup></b>                                                                                |                                                                                                                                                                                                                                                                                                                                                                                                                                                                                                                                                                                                                                                                                                                                                                                                                                                                                                                                                                                                                                                                                                                |                                                                                                                                                                                                                                                                                                                                                                                                                                                                                                                                                                                                                                              |                                                                                                                                                                                                                                                                                                                                                                                                                                                                                                                                                                                                                                                                                                                                                      |
|------------------------------------------------------------------------------------------------------------------------------------------------------------------------------------------------------------------------------------------------------------------------|----------------------------------------------------------------------------------------------------------------------------------------------------------------------------------------------------------------------------------------------------------------------------------------------------------------------------------------------------------------------------------------------------------------------------------------------------------------------------------------------------------------------------------------------------------------------------------------------------------------------------------------------------------------------------------------------------------------------------------------------------------------------------------------------------------------------------------------------------------------------------------------------------------------------------------------------------------------------------------------------------------------------------------------------------------------------------------------------------------------|----------------------------------------------------------------------------------------------------------------------------------------------------------------------------------------------------------------------------------------------------------------------------------------------------------------------------------------------------------------------------------------------------------------------------------------------------------------------------------------------------------------------------------------------------------------------------------------------------------------------------------------------|------------------------------------------------------------------------------------------------------------------------------------------------------------------------------------------------------------------------------------------------------------------------------------------------------------------------------------------------------------------------------------------------------------------------------------------------------------------------------------------------------------------------------------------------------------------------------------------------------------------------------------------------------------------------------------------------------------------------------------------------------|
| <b><i>p,p'</i>-DDD</b>                                                                                                                                                                                                                                                 | <b><i>p,p'</i>-DDT</b>                                                                                                                                                                                                                                                                                                                                                                                                                                                                                                                                                                                                                                                                                                                                                                                                                                                                                                                                                                                                                                                                                         | <b><i>p,p'</i>-DDE</b>                                                                                                                                                                                                                                                                                                                                                                                                                                                                                                                                                                                                                       | <b>Methoxychlor</b>                                                                                                                                                                                                                                                                                                                                                                                                                                                                                                                                                                                                                                                                                                                                  |
| <ul style="list-style-type: none"> <li>• <b>No effects on liver histopathology</b> in rats at a NOAEL of 231 mg/kg-day and in mice at a NOAEL of 142 mg/kg-day after exposure for 78 weeks but study was limited in design as a cancer bioassay (NCI, 1978)</li> </ul> | <ul style="list-style-type: none"> <li>• <b>Increased liver weight</b> in rats and mice at LOAELs of 6.25-40 mg/kg-day for 12-28 days (Gupta et al., 1989; DeWaziers and Azais 1987; Kostka et al. 2000; Orberg and Lundberg, 1974) and in hamsters at a LOAEL of 67 mg/kg-day after lifetime exposure (Graillot et al., 1975)</li> <li>• <b>Liver histopathology (ranging from hypertrophy, fatty degeneration and necrosis)</b> in rats, mice, hamsters and dogs at LOAELs of 0.25-160 mg/kg-day after subchronic and chronic exposure (Cabral et al., 1982a; Deichmann et al., 1967; Fitzhugh and Nelson 1947; Jonsson et al., 1981; Laug et al., 1950; Lehman, 1965; NCI, 1978; Ortega, 1956)</li> <li>• <b>Hepatocyte vacuolation, proliferation of bile duct cells, clear hepatocyte foci and necrosis</b> in rhesus and cynomolgus monkeys at a LOAEL of 6.4 mg/kg-day after exposure for 130 months (Takayama et al., 1999) but <b>no effects on liver histopathology</b> in rhesus monkeys at a lower dose (NOAEL of 3.9 mg/kg-day) after exposure for 3.5-7.5 years (Durham et al., 1963)</li> </ul> | <ul style="list-style-type: none"> <li>• <b>Increased liver weight</b> in rats and mice at LOAELs of 5-50 mg/kg-day after exposure for 1-6 weeks (Banerjee et al., 1996; Pash 1981) or after in utero and postnatal exposure (Patrick et al., 2016; Yamasaki et al., 2009)</li> <li>• <b>Liver histopathology (fatty degeneration and necrosis)</b> in rats and hamsters at LOAELs of 31-48 mg/kg-day after subchronic and chronic exposure (NCI, 1978; Patrick et al., 2016; Rossi et al., 1983)</li> <li>• <b>No effects on liver histopathology</b> in mice at a NOAEL of 49 mg/kg-day after exposure for 78 weeks (NCI, 1978)</li> </ul> | <ul style="list-style-type: none"> <li>• <b>Changes in liver weight (both increase and decrease)</b> in rats at a LOAELs of 150-1,200 mg/kg-day after subchronic exposure (Chapin et al., 1997; Davidson and Cox, 1976; Gray et al., 1999)</li> <li>• <b>Decreased serum albumin</b> in rats at a LOAEL of 20 mg/kg-day after exposure for 28 days (Okazaki et al., 2001)</li> <li>• <b>Gross liver lesions (pale/molting appearance)</b> in rabbits at a LOAEL of 35.5 mg/kg-day after in utero exposure (GD 7-19) but <b>no effects on liver histopathology</b> in rats at NOAELs of 77-917 mg/kg-day (Deichmann et al., 1967; NCI, 1978; Hagg et al., 1950) and in mice at a NOAEL of 599 mg/kg-day (NCI, 1978) after chronic exposure</li> </ul> |

<sup>a</sup>Data show liver effects and associated effect levels (no-observed-adverse-effect levels [NOAEL] and lowest-observed-adverse-effect levels [LOAEL]) from repeated-dose animal toxicity studies via oral administration reported by ATSDR (2002a, b) and U.S. EPA (2017 b, c). Studies for DDT, DDD, and methoxychlor include technical grade and analytical formulations of the *p,p'* isomers.

**Table A-2. Comparison of Reproductive Effects and Associated Effect Levels from Repeated-Dose Animal Studies for Non-Cancer Oral Toxicity for *p,p'*-DDD and Analogues<sup>a</sup>**

| <i>p,p'</i> -DDD                        | <i>p,p'</i> -DDT                                                                                                                                                                                                                                                                                                                                                                                                                                                                                                                                                                                                                                                                                                                                                                                                                                                                                                                                                                                                                                                                                                                                                                                       | <i>p,p'</i> -DDE                                                                                                                                                                                                                                                                                                                                                                                                                                 | Methoxychlor                                                                                                                                                                                                                                                                                                                                                                                                                                                                                                                                                                                                                                                                                                                                                                                                                                                                                                              |
|-----------------------------------------|--------------------------------------------------------------------------------------------------------------------------------------------------------------------------------------------------------------------------------------------------------------------------------------------------------------------------------------------------------------------------------------------------------------------------------------------------------------------------------------------------------------------------------------------------------------------------------------------------------------------------------------------------------------------------------------------------------------------------------------------------------------------------------------------------------------------------------------------------------------------------------------------------------------------------------------------------------------------------------------------------------------------------------------------------------------------------------------------------------------------------------------------------------------------------------------------------------|--------------------------------------------------------------------------------------------------------------------------------------------------------------------------------------------------------------------------------------------------------------------------------------------------------------------------------------------------------------------------------------------------------------------------------------------------|---------------------------------------------------------------------------------------------------------------------------------------------------------------------------------------------------------------------------------------------------------------------------------------------------------------------------------------------------------------------------------------------------------------------------------------------------------------------------------------------------------------------------------------------------------------------------------------------------------------------------------------------------------------------------------------------------------------------------------------------------------------------------------------------------------------------------------------------------------------------------------------------------------------------------|
| <b>Fertility and Pregnancy Outcomes</b> |                                                                                                                                                                                                                                                                                                                                                                                                                                                                                                                                                                                                                                                                                                                                                                                                                                                                                                                                                                                                                                                                                                                                                                                                        |                                                                                                                                                                                                                                                                                                                                                                                                                                                  |                                                                                                                                                                                                                                                                                                                                                                                                                                                                                                                                                                                                                                                                                                                                                                                                                                                                                                                           |
| Not Available                           | <ul style="list-style-type: none"> <li>• <b>Decreased fertility and/or infertility</b> in female rats at a LOAEL of 12 mg/kg-day for 36-weeks (Jonsson et al., 1976) and in male and female in mice at a LOAEL of 51.4 mg/kg-day for 60-90 days (Bernard and Gaertner 1964) or a LOAEL of 20 mg/kg-day for 3 generations (Keplinger et al., 1970)</li> <li>• <b>Adverse pregnancy outcomes, including increased resorptions</b> in rabbits at LOAELs of 10-50 mg/kg-day after in utero exposure (gestational day [GD] 7-9) (Hart et al., 1971, 1972) and <b>decreased corpora lutea, implants and implanted ova</b> in mice at a LOAEL of 1.67 mg/kg-day after exposure for 4-12 weeks (Lundberg 1974).</li> <li>• <b>No effects on fertility and/or pregnancy outcomes</b> generally at lower exposure doses: NOAELs of 1.3-6.25 mg/kg-day in mice exposed for 4-64 weeks (Ledoux et al., 1977; Orberg and Lundberg 1974; Ware and Good, 1967; Wolfe et al., 1979); NOAELs of 0.75-10 mg/kg-day in rats in multigenerational/chronic studies (Duby et al., 1971; Ottoboni 1969, 1972; Treon et al., 1954); a NOAEL of 10 mg/kg-day in a 2-generation study in dogs (Ottoboni et al., 1977)</li> </ul> | <ul style="list-style-type: none"> <li>• <b>Decreased fertility</b> in male and female rat offspring at LOAELs of 50-100 mg/kg-day after in utero and/or post-natal exposure (Song et al., 2014; Yamasaki et al., 2009) but <b>no effects on fertility and pregnancy outcomes</b> in parental rat dams at a LOAEL of 10 mg/kg-day after exposure for 5 weeks pre-mating through post-natal day (PND) 8 or 19 (Kornbrust et al., 1986)</li> </ul> | <ul style="list-style-type: none"> <li>• <b>Decreased fertility and/or infertility</b> in male and female rats at LOAELs of 50-200 mg/kg-day after subchronic exposure (Bal, 1984; Chapin et al., 1997; Gray et al., 1989, 1999; Harris et al., 1974) and at a LOAEL of 92 mg/kg-day after chronic/multigenerational exposure (Haskell Laboratories, 1966)</li> <li>• <b>Adverse pregnancy outcomes (including, pre- and post- implantation loss, accelerated embryo transport into the uterus, increased resorptions and abortions and decreased number of live pups per litter)</b> in rats and rabbits at LOAELs of 50-250 mg/kg-day after in utero only exposure (Culik and Kaplan 1976; Cummings and Laskey 1993; Cummings and Perreault 1990; Khera et al., 1978; Kincaid Enterprises 1986) or after short-term and subchronic exposures (Chapin et al., 1997; Cummings and Gray 1989; Gray et al. 1989)</li> </ul> |
| <b>Male-Specific Effects</b>            |                                                                                                                                                                                                                                                                                                                                                                                                                                                                                                                                                                                                                                                                                                                                                                                                                                                                                                                                                                                                                                                                                                                                                                                                        |                                                                                                                                                                                                                                                                                                                                                                                                                                                  |                                                                                                                                                                                                                                                                                                                                                                                                                                                                                                                                                                                                                                                                                                                                                                                                                                                                                                                           |
| Not Available                           | <ul style="list-style-type: none"> <li>• <b>Decreased testes weight</b> in juvenile rats at a LOAEL of 200 mg/kg-day</li> </ul>                                                                                                                                                                                                                                                                                                                                                                                                                                                                                                                                                                                                                                                                                                                                                                                                                                                                                                                                                                                                                                                                        | <ul style="list-style-type: none"> <li>• <b>Decreased anogenital distance, nipple retention, delayed puberty</b></li> </ul>                                                                                                                                                                                                                                                                                                                      | <ul style="list-style-type: none"> <li>• <b>Delayed puberty (delayed preputial separation)</b> in rats at a LOAEL of 100</li> </ul>                                                                                                                                                                                                                                                                                                                                                                                                                                                                                                                                                                                                                                                                                                                                                                                       |

|                                |                                                                                                                                                                                                                                                                                                                               |                                                                                                                                                                                                                                                                                                                                                                                                                                                                                                                                                                                                                                                                                                                                                                                                                                                                                                                                                                                                                                                                                                                              |                                                                                                                                                                                                                                                                                                                                                                                                                                                                                                                                                                                                                                                                                                                                                                                                                                                                                                                                                                                                                |
|--------------------------------|-------------------------------------------------------------------------------------------------------------------------------------------------------------------------------------------------------------------------------------------------------------------------------------------------------------------------------|------------------------------------------------------------------------------------------------------------------------------------------------------------------------------------------------------------------------------------------------------------------------------------------------------------------------------------------------------------------------------------------------------------------------------------------------------------------------------------------------------------------------------------------------------------------------------------------------------------------------------------------------------------------------------------------------------------------------------------------------------------------------------------------------------------------------------------------------------------------------------------------------------------------------------------------------------------------------------------------------------------------------------------------------------------------------------------------------------------------------------|----------------------------------------------------------------------------------------------------------------------------------------------------------------------------------------------------------------------------------------------------------------------------------------------------------------------------------------------------------------------------------------------------------------------------------------------------------------------------------------------------------------------------------------------------------------------------------------------------------------------------------------------------------------------------------------------------------------------------------------------------------------------------------------------------------------------------------------------------------------------------------------------------------------------------------------------------------------------------------------------------------------|
|                                | <p>after postnatal exposure (PND 4 and 5 or PND 4-23) (Krause et al., 1975) and <b>decreased testicular testosterone</b> in adult rats at a LOAEL of 100 mg/kg-day after 3-week exposure (Krause, 1977)</p>                                                                                                                   | <p><b>(delayed preputial separation), decreased weights of male reproductive organs (testis, ventral and dorsolateral prostate, seminal vesicle, glans penis, cauda epididymis and levator ani/bulbocavernosus muscles), altered sperm parameters and histopathology of the prostate and testes</b> in prenatal and juvenile rats at LOAELs of 10-100 mg/kg-day after in utero and/or postnatal exposure (Gray et al., 1999; Kelce et al., 1995; Loeffler and Peterson, 1999; Patrick et al., 2016; Song et al., 2014; Yamasaki et al., 2009; You et al., 1998)</p> <ul style="list-style-type: none"> <li>• <b>Decreased seminal vesicle and ventral prostate weight</b> in adult rats at a LOAEL of 200 mg/kg-day after short-term exposure (4-5 days) (Kelce et al., 1995)</li> <li>• <b>No effects on serum hormones (LH, FSH and testosterone), sperm counts and male reproductive organ weights and histopathology (testes, epididymides, prostate and seminal vesicles)</b> at a NOAEL of 10 mg/kg-day in rats exposed from GD 1- PND 21 (Makita and Omura, 2006) or from PNDs 42-84 (Makita et al., 2005)</li> </ul> | <p>mg/kg-day after exposure for 309 days (Gray et al., 1999)</p> <ul style="list-style-type: none"> <li>• <b>Decreased sperm counts</b> in rats at LOAELs of 100-200 mg/kg-day after exposure for 28-309 days (Gray et al., 1989, 1999; Okazaki et al., 2001)</li> <li>• <b>Gross and histopathological changes in male reproductive organs (including decreased testes weight and atrophy/degeneration of the testes, epididymis and mammary acinus)</b> in rats at LOAELs of 100-1,400 mg/kg-day after exposure for 28-309 days (Bal 1984, Gray et al. 1999; Hodge et al. 1950; Okasaki et al., 2001)</li> <li>• <b>Increased hormone levels in the pituitary (prolactin, FSH, TSH)</b> in rats at LOAELs of 25-100 mg/kg-day after exposure for 56-99 days (Gray et al. 1989; Goldman et al., 1986)</li> <li>• <b>Altered mating behavior including decreased mating frequency</b> in rats at LOAELs of 60-200 mg/kg-day after exposure for 42-309 days (Gray et al., 1999; Harris et al., 1974)</li> </ul> |
| <b>Female-Specific Effects</b> |                                                                                                                                                                                                                                                                                                                               |                                                                                                                                                                                                                                                                                                                                                                                                                                                                                                                                                                                                                                                                                                                                                                                                                                                                                                                                                                                                                                                                                                                              |                                                                                                                                                                                                                                                                                                                                                                                                                                                                                                                                                                                                                                                                                                                                                                                                                                                                                                                                                                                                                |
|                                | <ul style="list-style-type: none"> <li>• <b>Prolongation of estrus cycle</b> in mice at a LOAEL of 1.67 mg/kg-day (Lundberg 1974) and <b>reduced ovulation rate and decreased circulating progesterone</b> post-insimulation in rabbits at a LOAEL of 3 mg/kg-day after a 12-week exposure (Lindenau et al., 1994)</li> </ul> | <ul style="list-style-type: none"> <li>• <b>Precocious puberty (early vaginal opening)</b> in rats at a LOAEL of 50 mg/kg-day after exposure from GD 6- PND 20 (Yamasaki et al., 2009)</li> <li>• <b>No effects on serum hormones (LH, FSH, 17beta-estradiol and thyroxine) female reproductive organ weights and histopathology,</b></li> </ul>                                                                                                                                                                                                                                                                                                                                                                                                                                                                                                                                                                                                                                                                                                                                                                             | <ul style="list-style-type: none"> <li>• <b>Precocious puberty (early vaginal opening)</b> in rats at LOAELs of 5-60 mg/kg-day after short-term and subchronic exposures (Chaplin et al., 1997; Gray et al., 1989; Harris et al., 1974; Laws et al., 2000)</li> <li>• <b>Abnormal estrous cycle, including persistent estrus</b> in rats at LOAELs of 25-400 mg/kg-day after short-term and</li> </ul>                                                                                                                                                                                                                                                                                                                                                                                                                                                                                                                                                                                                         |

|  |  |                                                                                                                                 |                                                                                                                                                                                                                                                                                                                                                                                                                                                                                                                                                                                                                                                                                                                                                                                                                                                                                                                                                                                                                                                                                                                                                                                                                                                                                                                                                                                        |
|--|--|---------------------------------------------------------------------------------------------------------------------------------|----------------------------------------------------------------------------------------------------------------------------------------------------------------------------------------------------------------------------------------------------------------------------------------------------------------------------------------------------------------------------------------------------------------------------------------------------------------------------------------------------------------------------------------------------------------------------------------------------------------------------------------------------------------------------------------------------------------------------------------------------------------------------------------------------------------------------------------------------------------------------------------------------------------------------------------------------------------------------------------------------------------------------------------------------------------------------------------------------------------------------------------------------------------------------------------------------------------------------------------------------------------------------------------------------------------------------------------------------------------------------------------|
|  |  | <p><b>estrous cyclicity and vaginal opening</b> at a NOAEL of 10 mg/kg-day in rats exposed from GD 1- PND 21 (Makita, 2008)</p> | <p>subchronic exposures (Chapin et al., 1997; Gray et al., 1988, 1989; Harris et al., 1974; Okasaki et al., 2001; Martinez and Swartz 1991)</p> <ul style="list-style-type: none"> <li>• <b>Gross and histopathological changes in female reproductive organs (including changes in ovarian and uterine weights, ovarian cysts, atrophic/degenerative lesions in the ovaries and uterus, increased lipid accumulation in interstitial and thecal cells of the ovary and delayed regression of endometriosis)</b> in rats and mice at LOAELs of 50-400 mg/kg-day after subchronic exposure (Bal 1984; Chapin et al., 1997; Cummings and Metcalf 1995b; Gray et al., 1988, 1989; Harris et al., 1974; Martinez and Swartz 1991, 1992)</li> <li>• <b>Induction of uterine decidualization</b> at a LOAEL of 75 mg/kg-day (Cummings 1993) and <b>decreased uterine receptivity to implantation</b> at a LOAEL of 200 mg/kg-day (Cummings and Gray 1987) in rats after short-term exposure (8 days)</li> <li>• <b>Decreased serum progesterone</b> in rats at LOAELs of 50-100 mg/kg-day after short-term (3-8 days) (Cummings and Gray 1989) and in utero exposure (GD 1-8) (Cummings and Laskey 1993)</li> <li>• <b>Altered mating behavior including decreased mating frequency</b> in rats at LOAELs of 60-150 mg/kg-day after exposure for 6-12 weeks (Harris et al., 1974)</li> </ul> |
|--|--|---------------------------------------------------------------------------------------------------------------------------------|----------------------------------------------------------------------------------------------------------------------------------------------------------------------------------------------------------------------------------------------------------------------------------------------------------------------------------------------------------------------------------------------------------------------------------------------------------------------------------------------------------------------------------------------------------------------------------------------------------------------------------------------------------------------------------------------------------------------------------------------------------------------------------------------------------------------------------------------------------------------------------------------------------------------------------------------------------------------------------------------------------------------------------------------------------------------------------------------------------------------------------------------------------------------------------------------------------------------------------------------------------------------------------------------------------------------------------------------------------------------------------------|

<sup>a</sup>Data show reproductive effects and associated effect levels (no-observed-adverse-effect levels [NOAEL] and lowest-observed-adverse-effect levels [LOAEL]) from repeated-dose animal toxicity studies via oral administration reported by ATSDR (2002a, b) and U.S. EPA (2017 b, c). Studies for DDT, DDD, and methoxychlor include technical grade and analytical formulations of the *p,p'* isomers.

| <b>Table A-3. AC50 Values (µM) for <i>p,p'</i>-DDD and Analogues from ToxCast Assays in Human Liver Cells Grouped by Biological Response/Target<sup>a</sup></b> |                                  |                        |                        |                        |                     |                             |                  |
|-----------------------------------------------------------------------------------------------------------------------------------------------------------------|----------------------------------|------------------------|------------------------|------------------------|---------------------|-----------------------------|------------------|
| <b>Biological Response/Target</b>                                                                                                                               | <b>Assay Name<sup>b</sup></b>    | <b><i>p,p'</i>-DDD</b> | <b><i>p,p'</i>-DDT</b> | <b><i>p,p'</i>-DDE</b> | <b>Methoxychlor</b> | <b>Assay Design</b>         | <b>Cell Line</b> |
| <b>Mitochondrial damage</b>                                                                                                                                     | APR_HepG2_MitoMass_24h_dn        | 89.3                   | 45                     | 55.1                   | Inactive            | Morphology reporter         | HepG2            |
|                                                                                                                                                                 | APR_HepG2_MitoMass_72h_dn        | Inactive               | Inactive               | 61                     | Inactive            | Morphology reporter         | HepG2            |
|                                                                                                                                                                 | APR_HepG2_MitoMembPot_1h_dn      | NA                     | NA                     | NA                     | 98                  | Membrane potential reporter | HepG2            |
|                                                                                                                                                                 | APR_HepG2_MitoMembPot_24h_dn     | 64.9                   | 25.7                   | 18.4                   | Inactive            | Membrane potential reporter | HepG2            |
|                                                                                                                                                                 | APR_HepG2_MitoMembPot_72h_dn     | Inactive               | 25.8                   | Inactive               | Inactive            | Membrane potential reporter | HepG2            |
|                                                                                                                                                                 | TOX21_MMP_ratio_down             | 17.5                   | 22.1                   | 32.5                   | 59.4                | Membrane potential reporter | HepG2            |
| <b>Cellular stress/cytotoxicity</b>                                                                                                                             | APR_HepG2_CellLoss_24h_dn        | 104                    | 57.6                   | 56.5                   | 71.4                | Viability reporter          | HepG2            |
|                                                                                                                                                                 | APR_HepG2_CellLoss_72h_dn        | 97.3                   | 53.5                   | 30.3                   | 75.1                | Viability reporter          | HepG2            |
|                                                                                                                                                                 | APR_HepG2_OxidativeStress_24h_up | 109                    | 52                     | 59.4                   | Inactive            | Viability reporter          | HepG2            |
|                                                                                                                                                                 | APR_HepG2_OxidativeStress_72h_up | 104                    | 55.4                   | Inactive               | 98.2                | Viability reporter          | HepG2            |
|                                                                                                                                                                 | APR_HepG2_p53Act_24h_up          | 108                    | 54.5                   | 58.9                   | Inactive            | Viability reporter          | HepG2            |
|                                                                                                                                                                 | APR_HepG2_p53Act_72h_up          | 89.2                   | Inactive               | Inactive               | 76.6                | Viability reporter          | HepG2            |
|                                                                                                                                                                 | APR_HepG2_StressKinase_24h_up    | Inactive               | 52.6                   | Inactive               | Inactive            | Enzyme reporter             | HepG2            |
|                                                                                                                                                                 | APR_HepG2_StressKinase_72h_up    | 115                    | Inactive               | Inactive               | Inactive            | Enzyme reporter             | HepG2            |
| <b>Cell cycle</b>                                                                                                                                               | APR_HepG2_CellCycleArrest_24h_dn | 101                    | Inactive               | Inactive               | Inactive            | Morphology reporter         | HepG2            |

|                                            |                                  |          |          |          |          |                       |       |
|--------------------------------------------|----------------------------------|----------|----------|----------|----------|-----------------------|-------|
|                                            | APR_HepG2_CellCycleArrest_24h_up | Inactive | 82.1     | Inactive | Inactive | Morphology reporter   | HepG2 |
|                                            | APR_HepG2_CellCycleArrest_72h_dn | 102      | 26       | 17.3     | Inactive | Morphology reporter   | HepG2 |
|                                            | APR_HepG2_MitoticArrest_24h_up   | 90.2     | 50.5     | 60       | Inactive | Morphology reporter   | HepG2 |
|                                            | APR_HepG2_MitoticArrest_72h_up   | 69.6     | 44.3     | 17.8     | 68.3     | Morphology reporter   | HepG2 |
| <b>Cellular/organelle conformation</b>     | APR_HepG2_MicrotubuleCSK_24h_dn  | 133      | Inactive | Inactive | Inactive | Conformation reporter | HepG2 |
|                                            | APR_HepG2_MicrotubuleCSK_24h_up  | Inactive | Inactive | Inactive | 71.6     | Conformation reporter | HepG2 |
|                                            | APR_HepG2_MicrotubuleCSK_72h_dn  | 132      | Inactive | Inactive | Inactive | Conformation reporter | HepG2 |
|                                            | APR_HepG2_MicrotubuleCSK_72h_up  | Inactive | Inactive | Inactive | 80.9     | Conformation reporter | HepG2 |
|                                            | APR_HepG2_NuclearSize_24h_dn     | 109      | 59.9     | Inactive | Inactive | Morphology reporter   | HepG2 |
| <b>Transcriptional factors<sup>c</sup></b> | ATG_AP_1_CIS_up                  | 42       | 49.9     | 79.1     | 44.6     | Inducible reporter    | HepG2 |
|                                            | ATG_C_EBP_CIS_up                 | 57.2     | Inactive | Inactive | Inactive | Inducible reporter    | HepG2 |
|                                            | ATG_CRE_CIS_up                   | 57.2     | Inactive | Inactive | Inactive | Inducible reporter    | HepG2 |
|                                            | ATG_EGR_CIS_up                   | 38.1     | Inactive | Inactive | Inactive | Inducible reporter    | HepG2 |
|                                            | ATG_GLI_CIS_up                   | 25.2     | Inactive | 64.5     | Inactive | Inducible reporter    | HepG2 |
|                                            | ATG_HIF1a_CIS_up                 | Inactive | Inactive | 56       | Inactive | Inducible reporter    | HepG2 |
|                                            | ATG_HSE_CIS_up                   | 57.2     | Inactive | Inactive | Inactive | Inducible reporter    | HepG2 |
|                                            | ATG_MRE_CIS_up                   | 42.7     | 72.9     | Inactive | 12.7     | Inducible reporter    | HepG2 |
|                                            | ATG_Myc_CIS_up                   | 38.8     | Inactive | 121      | Inactive | Inducible reporter    | HepG2 |
|                                            | ATG_NFI_CIS_up                   | 57.2     | 48.1     | 111      | Inactive | Inducible reporter    | HepG2 |

|                                      |                             |          |          |          |          |                    |       |
|--------------------------------------|-----------------------------|----------|----------|----------|----------|--------------------|-------|
|                                      | ATG_NRF1_CIS_up             | Inactive | Inactive | 78.1     | Inactive | Inducible reporter | HepG2 |
|                                      | ATG_NRF2_ARE_CIS_up         | 42.1     | 26.9     | 50.5     | 3.4      | Inducible reporter | HepG2 |
|                                      | ATG_Oct_MLP_CIS_up          | 41.8     | 70.6     | 90.9     | Inactive | Inducible reporter | HepG2 |
|                                      | ATG_Pax6_CIS_up             | 57.2     | Inactive | Inactive | Inactive | Inducible reporter | HepG2 |
|                                      | ATG_Sox_CIS_up              | 57.2     | Inactive | Inactive | Inactive | Inducible reporter | HepG2 |
|                                      | ATG_Sp1_CIS_up              | 57.2     | 69.3     | 86.6     | Inactive | Inducible reporter | HepG2 |
|                                      | ATG_SREBP_CIS_up            | 57.2     | 79.9     | 104      | Inactive | Inducible reporter | HepG2 |
|                                      | ATG_Xbp1_CIS_up             | 46.8     | Inactive | 97.4     | Inactive | Inducible reporter | HepG2 |
|                                      | TOX21_ARE_BLA_agonist_ratio | 68.7     | Inactive | 78.5     | Inactive | Inducible reporter | HepG2 |
| <b>Nuclear receptors<sup>c</sup></b> | ATG_CAR_TRANS_up            | Inactive | 20.9     | Inactive | Inactive | Inducible reporter | HepG2 |
|                                      | ATG_DR5_CIS_up              | 57.2     | Inactive | Inactive | Inactive | Inducible reporter | HepG2 |
|                                      | ATG_ERa_TRANS_up            | 17.3     | 4.41     | 2.83     | 0.913    | Inducible reporter | HepG2 |
|                                      | ATG_ERE_CIS_up              | 19.5     | 4.74     | 14.7     | 2.5      | Inducible reporter | HepG2 |
|                                      | ATG_FXR_TRANS_up            | 13.1     | Inactive | Inactive | Inactive | Inducible reporter | HepG2 |
|                                      | ATG_PXR_TRANS_up            | 8.34     | 8.2      | 7.49     | 1.03     | Inducible reporter | HepG2 |
|                                      | ATG_PXRE_CIS_up             | 5.99     | 4.31     | 3.14     | 2.62     | Inducible reporter | HepG2 |
|                                      | ATG_RXRb_TRANS_up           | 36.3     | 10.6     | 15       | Inactive | Inducible reporter | HepG2 |
|                                      | ATG_THRa1_TRANS_up          | 28.8     | Inactive | Inactive | Inactive | Inducible reporter | HepG2 |
|                                      | ATG_VDRE_CIS_up             | 16.9     | Inactive | Inactive | 5.43     | Inducible reporter | HepG2 |

|                           |                 |    |    |    |      |                    |                     |
|---------------------------|-----------------|----|----|----|------|--------------------|---------------------|
| <b>Metabolism enzymes</b> | CLD_CYP1A1_48hr | NA | NA | NA | 29.6 | Inducible reporter | Primary hepatocytes |
|                           | CLD_CYP1A1_6hr  | NA | NA | NA | 15.1 | Inducible reporter | Primary hepatocytes |
|                           | CLD_CYP1A2_24hr | NA | NA | NA | 5.06 | Inducible reporter | Primary hepatocytes |
|                           | CLD_CYP1A2_48hr | NA | NA | NA | 4.59 | Inducible reporter | Primary hepatocytes |
|                           | CLD_CYP1A2_6hr  | NA | NA | NA | 16   | Inducible reporter | Primary hepatocytes |
|                           | CLD_CYP2B6_24hr | NA | NA | NA | 10.5 | Inducible reporter | Primary hepatocytes |
|                           | CLD_CYP2B6_48hr | NA | NA | NA | 10.5 | Inducible reporter | Primary hepatocytes |
|                           | CLD_CYP2B6_6hr  | NA | NA | NA | 10.4 | Inducible reporter | Primary hepatocytes |
|                           | CLD_CYP3A4_24hr | NA | NA | NA | 29.5 | Inducible reporter | Primary hepatocytes |
|                           | CLD_CYP3A4_48hr | NA | NA | NA | 22.7 | Inducible reporter | Primary hepatocytes |
|                           | CLD_CYP3A4_6hr  | NA | NA | NA | 31.5 | Inducible reporter | Primary hepatocytes |
|                           | CLD_UGT1A1_24hr | NA | NA | NA | 5.44 | Inducible reporter | Primary hepatocytes |
|                           | CLD_UGT1A1_48hr | NA | NA | NA | 10.2 | Inducible reporter | Primary hepatocytes |

<sup>a</sup>Data were sourced from the EPA's CompTox Chemistry Dashboard (U.S. EPA, 2017a).

<sup>b</sup>Assays for which all chemicals were inactive are not displayed.

<sup>c</sup>Nuclear receptor and transcriptional factor assays were designed to measure inducible activity. Therefore, responses from assays analyzed in the negative fitting direction relative to the control ('\_dn') are considered non-specific and are not presented in this table.

NA = Not available



**Table A-4. Activity Summary for *p,p'*-DDD and Analogues from ToxCast Assays Evaluating Regulation of Transcriptional Factor Activity in Human Hepatoma HepG2 Cells<sup>a</sup>**

| Nuclear receptor gene <sup>b</sup> | Organism | <i>p,p'</i> -DDD |              | <i>p,p'</i> -DDT |              | <i>p,p'</i> -DDE |              | Methoxychlor  |              |
|------------------------------------|----------|------------------|--------------|------------------|--------------|------------------|--------------|---------------|--------------|
|                                    |          | Active Assays    | Total Assays | Active Assays    | Total Assays | Active Assays    | Total Assays | Active Assays | Total Assays |
| AR (AR)                            | Human    | 0                | 1            | 0                | 1            | 0                | 1            | 0             | 1            |
| CAR (NR1I3)                        | Human    | 0                | 2            | 1                | 2            | 0                | 2            | 0             | 2            |
| ER (ESR1)                          | Human    | 2                | 2            | 2                | 2            | 2                | 2            | 2             | 2            |
| ERR (ESRRA, ESRRG)                 | Human    | 0                | 2            | 0                | 2            | 0                | 2            | 0             | 2            |
| FXR (NR1H4)                        | Human    | 1                | 2            | 0                | 2            | 0                | 2            | 0             | 2            |
| GR (NR3C1)                         | Human    | 0                | 2            | 0                | 2            | 0                | 2            | 0             | 2            |
| HNF4A                              | Human    | 0                | 1            | 0                | 1            | 0                | 1            | 0             | 1            |
| LXR (NR1H3, NR1H2)                 | Human    | 0                | 3            | 0                | 3            | 0                | 3            | 0             | 3            |
| NURR1 (NR4A2)                      | Human    | 0                | 1            | 0                | 1            | 0                | 1            | 0             | 1            |
| PPAR (PPARA, PPARG, PPARG)         | Human    | 0                | 4            | 0                | 4            | 0                | 4            | 0             | 4            |
| PXR (NR1I2)                        | Human    | 2                | 2            | 2                | 2            | 2                | 2            | 2             | 2            |
| RAR (RARA, RARB, RARG)             | Human    | 1                | 4            | 0                | 4            | 0                | 4            | 0             | 4            |
| ROR (RORA, RORB, RARG)             | Human    | 0                | 3            | 0                | 3            | 0                | 3            | 0             | 3            |
| RXR (RXRA, RXRB)                   | Human    | 1                | 2            | 1                | 2            | 1                | 2            | 0             | 2            |
| TR (THRA)                          | Human    | 1                | 1            | 0                | 1            | 0                | 1            | 0             | 1            |
| VDR                                | Human    | 1                | 2            | 0                | 2            | 0                | 2            | 1             | 2            |

<sup>a</sup>Data were sourced from the EPA's CompTox Chemistry Dashboard (U.S. EPA, 2017a).

<sup>b</sup>Nuclear receptor abbreviation (gene symbol).

Abbreviations: AR, androgen receptor; CAR, constitutive androgen receptor; ER, estrogen receptor; ERR, estrogen-related receptor; FXR, farnesoid X receptor; GR, glucocorticoid receptor; HNF4A, hepatocyte nuclear factors 4 alpha; LXR, liver X receptor; NURR1, nuclear receptor related-1 protein; PPAR, peroxisome proliferator-activated receptor; PXR, pregnane X receptor; RAR, retinoid acid receptor; ROR, RAR-related orphan receptor; RXR, retinoid X receptor; TR, thyroid hormone receptor; VDR, vitamin D receptor.

| Table A-5. AC50 Values (µM) for <i>p,p'</i> -DDD and Analogues from ToxCast Assays Evaluating Key Signaling Events in the ER and AR pathways <sup>a</sup> |                                |                  |                  |                  |              |            |        |
|-----------------------------------------------------------------------------------------------------------------------------------------------------------|--------------------------------|------------------|------------------|------------------|--------------|------------|--------|
| Assay Name <sup>b</sup>                                                                                                                                   |                                | <i>p,p'</i> -DDD | <i>p,p'</i> -DDT | <i>p,p'</i> -DDE | Methoxychlor | Organism   | Tissue |
| <b>ER pathway</b>                                                                                                                                         |                                |                  |                  |                  |              |            |        |
| Receptor binding                                                                                                                                          | NVS_NR_hER                     | 1.0E+06          | 1.0E+06          | 1.0E+06          | 6.0          | Human      | NA     |
| Receptor dimerization                                                                                                                                     | OT_ER_ERaERa_0480              | 1.0E+06          | 59.8             | 46.2             | 11.1         | Human      | Kidney |
|                                                                                                                                                           | OT_ER_ERaERa_1440              | 1.0E+06          | 1.0E+06          | 1.0E+06          | 4.0          | Human      | Kidney |
|                                                                                                                                                           | OT_ER_ERaERb_0480              | 32.4             | 56.7             | 38.1             | 9.6          | Human      | Kidney |
|                                                                                                                                                           | OT_ER_ERaERb_1440              | 1.0E+06          | 5.1              | 16.1             | 3.9          | Human      | Kidney |
|                                                                                                                                                           | OT_ER_ERbERb_0480              | 18.7             | 14.5             | 20.5             | 5.3          | Human      | Kidney |
|                                                                                                                                                           | OT_ER_ERbERb_1440              | 1.0E+06          | 6.1              | 12.8             | 3.5          | Human      | Kidney |
| DNA binding                                                                                                                                               | OT_ERa_EREGFP_0120             | 17.0             | 4.7              | 17.0             | 2.7          | Human      | Cervix |
|                                                                                                                                                           | OT_ERa_EREGFP_0480             | 14.0             | 3.3              | 1.0E+06          | 3.1          | Human      | Cervix |
| RNA transcription                                                                                                                                         | ATG_ERa_TRANS_up               | 17.3             | 4.4              | 3.5              | 0.9          | Human      | Liver  |
|                                                                                                                                                           | ATG_ERE_CIS_up                 | 19.5             | 4.7              | 14.7             | 2.5          | Human      | Liver  |
| Agonist transactivation                                                                                                                                   | Tox21_ERa_BLA_Agonist_ratio    | 1.0E+06          | 43.7             | 1.0E+06          | 1.0E+06      | Human      | Kidney |
|                                                                                                                                                           | Tox21_ERa_LUC_BG1_Agonist      | 19.3             | 11.1             | 1.0E+06          | 10.0         | Human      | Ovary  |
| Cell proliferation                                                                                                                                        | ACEA_T47D_80hr_Positive        | 1.0E+06          | 1.0E+06          | 1.0E+06          | 10.2         | Human      | Breast |
| Antagonist transactivation                                                                                                                                | Tox21_ERa_BLA_Antagonist_ratio | 1.0E+06          | 1.0E+06          | 1.0E+06          | 44.2         | Human      | Kidney |
| <b>AR pathway</b>                                                                                                                                         |                                |                  |                  |                  |              |            |        |
| Receptor binding                                                                                                                                          | NVS_NR_cAR                     | 1.0E+06          | 1.0E+06          | 21.9             | 1.0E+06      | Chimpanzee | NA     |
| Co-factor recruitment                                                                                                                                     | OT_AR_ARSRC1_0480              | 62.8             | 72.0             | 58.7             | 1.0E+06      | Human      | Kidney |
|                                                                                                                                                           | OT_AR_ARSRC1_0960              | 49.7             | 47.0             | 37.3             | 34.2         | Human      | Kidney |
| Antagonist transactivation                                                                                                                                | TOX21_AR_BLA_Antagonist_ratio  | 40.0             | 1.0E+06          | 1.0E+06          | 29.3         | Human      | Kidney |
|                                                                                                                                                           | TOX21_AR_LUC_MDAKB2_Antagonist | 31.0             | 17.8             | 7.0              | 40.8         | Human      | Breast |

<sup>a</sup> Data for ER and AR activities were sourced from Judson et al., (2015) and Kleinstreuer et al., (2016), respectively.

<sup>b</sup> Assays for which all chemicals were inactive are not displayed.

An AC50 value of 1.0E+06 indicates that the chemical was inactive in that assay.

NA = not applicable (cell-free binding assay).
